1 **Induction of robust neutralizing antibodies against the COVID-19 Delta variant with**  
2 **ChAdOx1 nCoV-19 or BNT162b2 as a booster following a primary vaccination series with**  
3 **CoronaVac**

4  
5 Samadhi Patamatamkul<sup>1</sup>, Sutthiwan Thammawat<sup>1</sup>, Benjaporn Buranrat<sup>2</sup>

6  
7 <sup>1</sup>Faculty of Medicine, Mahasarakham University, Muang District, Maha Sarakham, 44000,  
8 Thailand

9 <sup>2</sup>Biomedical Sciences Research Unit, Faculty of Medicine, Mahasarakham University, Muang  
10 District, Maha Sarakham, 44000, Thailand

11  
12 Running title

13 Neutralizing antibody after the third booster

14  
15 \*Corresponding author name and full mailing address

16 Samadhi Patamatamkul, M.D.  
17 Department of Medicine, Faculty of Medicine, Mahasarakham  
18 University 44000, Bangkok, Thailand  
19 Tel +66815441374. Email address: [samadhi.p@msu.ac.th](mailto:samadhi.p@msu.ac.th)

20  
21 E-mail:  
22 [sutthiwan.t@msu.ac.th](mailto:sutthiwan.t@msu.ac.th)  
23 [benjaporn.b@msu.ac.th](mailto:benjaporn.b@msu.ac.th)

24  
25 Word count: 1,011 including references

26  
27  
28  
29  
30  
31

32

33 **Abstract**

34

35 We determined the antibody response among CoronaVac vaccinees who were boosted  
36 with either BNT162b2 or ChAdOx1 nCoV-19. Increase in anti-S-RBD antibodies and surrogate  
37 neutralizing antibodies against the Delta variant was higher in BNT162b2 recipients than in  
38 ChAdOx1 nCoV-19 recipients. High proportions of reactogenicity were seen for both booster  
39 regimens.

40

41 **Keywords:** Neutralizing antibody, COVID-19 vaccination, third booster

42

43

44

45

46

47

48

49

50

51

52

53

54

55

56

57

58

59

60

61

62

63 As the COVID-19 Delta variant spreads globally, COVID-19 breakthrough infections are  
64 increasing despite primary COVID-19 vaccination being completed. In Thailand, most  
65 healthcare personnel have been vaccinated with an inactivated virus vaccine, CoronaVac  
66 (Sinovac Biotech, Beijing, China). A recent viral neutralization test (VNT) of CoronaVac  
67 vaccinees in the Thai population demonstrated markedly reduced titers against the Delta variant  
68 as compared to convalescent sera [1]. Therefore, a booster dose of either ChAdOx1 nCoV-19 or  
69 BNT162b2 was voluntarily administered to healthcare personnel in Thailand in July–August  
70 2021 as per national policy. Here, we examined the immunogenicity and reactogenicity among  
71 healthcare personnel before and after CoronaVac and the third booster dose.

72 We prospectively enrolled 41 healthcare personnel from Suddhavej Hospital,  
73 Mahasarakham University, Mahasarakham, Thailand, for longitudinal collection of blood  
74 samples (pre-vaccination, post-second CoronaVac, pre-booster, post-booster) during April to  
75 August 2021. All participants were seronegative for anti-S-RBD (spike protein receptor-binding  
76 domain) and anti-nucleocapsid antibodies before COVID-19 vaccination, and had not been  
77 previously diagnosed with COVID-19 infection.

78 We used Elecsys Anti-SARS-CoV-2  $\square$ S (Roche Diagnostics GmbH, Mannheim,  
79 Germany) and a cPass™ SARS-CoV-2 NAbs Detection Kit as a surrogate VNT (sVNT)  
80 (GenScript, Piscataway, NJ, USA) to examine immunogenicity. The sVNT uses a SARS-CoV-2  
81 spike protein (RBD, L452R, T478K, Avi & His Tag)-HRP reagent, which is specific for the  
82 Delta variant S-RBD. The sVNT protocol followed the manufacturer's instructions, with a 30%  
83 inhibition cutoff described elsewhere [2].

84 Of the 41 participants, 23 received BNT162b2 as the booster dose. Age and gender did  
85 not differ significantly among the ChAdOx1 nCoV-19 and BNT162b2 recipients:  $38 \pm 10.26$  vs.  
86  $32.04 \pm 3.42$  years ( $p = 0.188$ ); 66.7% vs. 60.9% female ( $p = 0.702$ ). One participant per group  
87 had pre-existing diabetes mellitus.

88 The post-second CoronaVac and pre-booster sera anti-S-RBD antibody levels did not  
89 differ significantly: 64.72 U/mL (interquartile range [IQR], 22.23–188.86) vs. 106.8 U/mL (IQR,  
90 49.89–151.7) ( $p = 0.270$ ) for ChAdOx1 nCoV-19, and 37.78 U/mL (IQR, 16.79–73.8) vs. 37.46  
91 U/mL (IQR, 23.39–51.60) ( $p = 0.932$ ) for BNT162b2. Anti-S-RBD-antibodies were significantly  
92 higher after booster vaccination with BNT162b2 rather than with ChAdOx1 nCoV-19: 22,558  
93 U/mL (IQR, 15,956–25,000) vs. 5,159 U/mL (IQR, 3,647.75–9,196.75) ( $p < 0.001$ ) (Figure 1A).

94 Up to 65.7% of CoronaVac vaccinees in the whole cohort achieved sVNT  $\geq$  30%  
95 inhibition, as did 64.3% and 66.7% of ChAdOx1 nCoV-19 and BNT162b2 recipients,  
96 respectively. The proportions of participants who maintained pre-booster sVNT  $\geq$  30% inhibition  
97 decreased significantly after the second CoronaVac shot: 65.7% (95% confidence interval [CI],  
98 49.1–79.2) to 12.9% (95% CI, 4.5–29.5) ( $p < 0.001$ ). After the booster shot, this increased to  
99 100% (95% CI, 89.8–100) ( $p < 0.001$ ). The median sVNT from after the second CoronaVac to  
100 before the booster shot significantly declined: 37.67% (IQR, 25.58–61.54) to 18.71% (IQR,  
101 9.66–20.98). It increased after boosting to 97.52% (IQR, 96.72–98.03) (Figure 1B). BNT162b2  
102 recipients had higher sVNT than ChAdOx1 nCoV-19 recipients: 97.76% (IQR, 97.5–98.29) vs.  
103 97.02% (IQR, 93.8–97.64), respectively ( $p < 0.001$ ; Figure 1C).

104 Anti-S-RBD antibodies correlated with the sVNT value (Spearman correlation coefficient  
105 of 0.82; 95% CI, 0.75–0.88) ( $p < 0.001$ ). At anti-S-RBD antibody levels of  $\geq$  583 U/mL, the  
106 sensitivity, specificity, positive predictive value, and negative predictive value for sVNT  $\geq$  68%  
107 were 83.1%, 100%, 100%, and 85.5%, respectively.

108 The median time between collection of post-second CoronaVac sera and pre-booster sera  
109 was not significantly different between the two groups: 4 weeks (IQR, 3–5.25) vs. 4 weeks (IQR,  
110 3–4) for ChAdOx1 nCoV-19, and 11 weeks (IQR, 10–12) vs. 12 weeks (IQR, 11.75–12) for  
111 BNT162b2. The median time between the booster dose and serum collection was 3 weeks (IQR,  
112 2.75–3) vs. 2 weeks (IQR, 2–2), respectively ( $p < 0.001$ ).

113 All participants had at least one symptom after the booster (Table 1). Up to 92.5% of  
114 participants used acetaminophen for relieving symptoms.

115 This is the first prospective study of a booster dose with viral vector or mRNA vaccine  
116 after CoronaVac vaccination in the Thai population. Our findings demonstrate a robust antibody  
117 response in terms of both anti-S-RBD antibodies and sVNT after boosting with ChAdOx1  
118 nCoV-19, and even more so with BNT162b2. All participants achieved more than 68%  
119 inhibition against the Delta variant, which is the cutoff for high-titer neutralizing antibodies  
120 according to the US-FDA. Our findings are concordant with the mouse model, where a  
121 heterologous vaccine booster with either viral vector or mRNA vaccine after completion of the  
122 primary regimen with an inactivated vaccine significantly increased the levels of neutralizing  
123 antibodies [3].

124 With regard to CoronaVac durability, we found that only 12.9% maintained sVNT at  
125 above the cutoff after 3 months. Our findings are concordant with the previous study regarding  
126 the persistence of anti-spike antibodies with decreasing neutralizing effect [4].

127 We found overall higher reactogenicity in our cohort than previously reported with  
128 BNT162b2 or ChAdOx1 nCoV-19 [5].

129 In conclusion, after CoronaVac primary vaccination, both BNT162b2- and ChAdOx1  
130 nCoV-19-boosted recipients demonstrated consistently high neutralizing antibodies against the  
131 Delta variant. BNT162b2 may be a more favorable booster, with significantly higher neutralizing  
132 antibodies, which may correlate with better clinical effectiveness.

133

### 134 **Funding source**

135 This work was supported by the Faculty of Medicine, Mahasarakham University.

136

### 137 **Conflicts of interests**

138 The authors declare no conflicts of interest.

139

### 140 **Acknowledgements**

141 We thank all the laboratory technicians who helped with the sample collection throughout  
142 the study.

143

### 144 **Ethical approval**

145 The Mahasarakham University Ethics Committee approved the study. Informed consent  
146 was obtained before blood collection.

147

### 148 **References**

- 149 1. Vacharathit V, Aiewsakun P, Manopwisedjaroen S, Srisaowakarn C, Laopanupong T,  
150 Ludowyke N, et al. CoronaVac induces lower neutralising activity against variants of  
151 concern than natural infection. *Lancet Infect Dis* 2021. [https://doi.org/10.1016/S1473-3099\(21\)00568-5](https://doi.org/10.1016/S1473-3099(21)00568-5).  
152
- 153 2. Tan CW, Chia WN, Qin X, Liu P, Chen MI-C, Tiu C, et al. A SARS-CoV-2 surrogate  
154 virus neutralization test based on antibody-mediated blockage of ACE2-spike protein-

- 155 protein interaction. *Nat Biotechnol* 2020;38:1073–8. [https://doi.org/10.1038/s41587-020-](https://doi.org/10.1038/s41587-020-0631-z)  
156 [0631-z](https://doi.org/10.1038/s41587-020-0631-z).
- 157 3. Zhang J, He Q, An C, Mao Q, Gao F, Bian L, et al. Boosting with heterologous vaccines  
158 effectively improves protective immune responses of the inactivated SARS-CoV-2  
159 vaccine. *Emerg Microbes Infect* 2021;10:1598–608.  
160 <https://doi.org/10.1080/22221751.2021.1957401>.
- 161 4. Widge AT, Roupheal NG, Jackson LA, Anderson EJ, Roberts PC, Makhene M, et al.  
162 Durability of Responses after SARS-CoV-2 mRNA-1273 Vaccination. *N Engl J Med*  
163 2021;384:80–2. <https://doi.org/10.1056/NEJMc2032195>.
- 164 5. Hillus D, Schwarz T, Tober-Lau P, Vanshylla K, Hastor H, Thibeault C, et al. Safety,  
165 reactogenicity, and immunogenicity of homologous and heterologous prime-boost  
166 immunisation with ChAdOx1 nCoV-19 and BNT162b2: a prospective cohort study.  
167 *Lancet Respir Med* 2021. [https://doi.org/10.1016/S2213-2600\(21\)00357-X](https://doi.org/10.1016/S2213-2600(21)00357-X).

168

#### 169 **Authors' contributions**

170 SP: Designed the study, interpreted the findings, and wrote the paper.

171 BB: Performed the laboratory experiments and interpreted the findings.

172 ST: Performed the laboratory experiments and interpreted the findings.

173

174

175

176

177

178

179

180

181

182

183

184

185

186 **Figure legends**

187 **Figure 1.** (A) Longitudinal changes in anti-S-RBD antibodies before and after CoronaVac and  
188 after booster between BNT162b2 and ChAdOx1 nCoV-19 recipients are shown as separated  
189 scatter with bars. The positive cutoff value at  $\geq 0.8$  U/mL denotes reactive anti-S-RBD  
190 antibodies. Error bars represent the median and IQR. (B) Scatter plots demonstrate longitudinal  
191 changes in sVNT in the whole cohort. Dashed lines represent the median. (C) Scatter plots with  
192 each replicate connected show longitudinal changes in sVNT between BNT162b2 and ChAdOx1  
193 nCoV-19 recipients;  $\geq 30\%$  inhibition denotes significant inhibition of the Delta variant.  $P \leq 0.05$   
194 (two-sided) denotes a significant difference using non-parametric Friedman's two-way analysis  
195 with Bonferroni correction for multiple tests. All statistical analyses were performed with SPSS  
196 28 (IBM Corp., Armonk, NY, USA).

197

198

199

200

201

202

203

204

205

206

207

208

209

210

211

212

213

214

215

216

217 **Table legends**

218 **Table 1.**

219 † One participant had peripheral bilateral numbness of the hands, achieving recovery after 1-  
220 week gabapentin; another had acute tonsillitis requiring antibiotics.

221

222

223

224

225

226

227

228

229

230

231

232

233

234

235

236

237

238

239

240

241

242

243

244

245

246

247



248 **Figures**

249 Figure 1

250

251 A

252

253

254

255

256

257

258

259

260

261

262

263

264

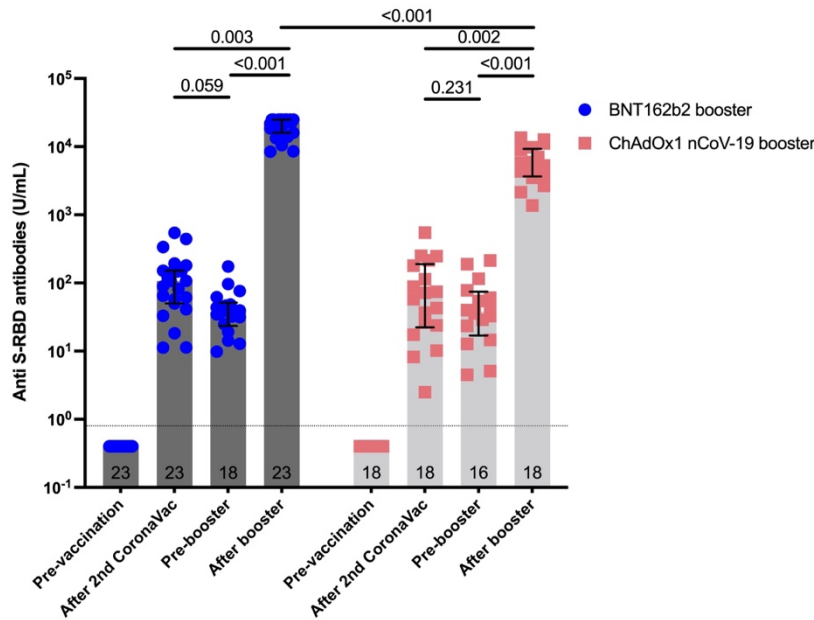

265 B

266

267

268

269

270

271

272

273

274

275

276

277

278

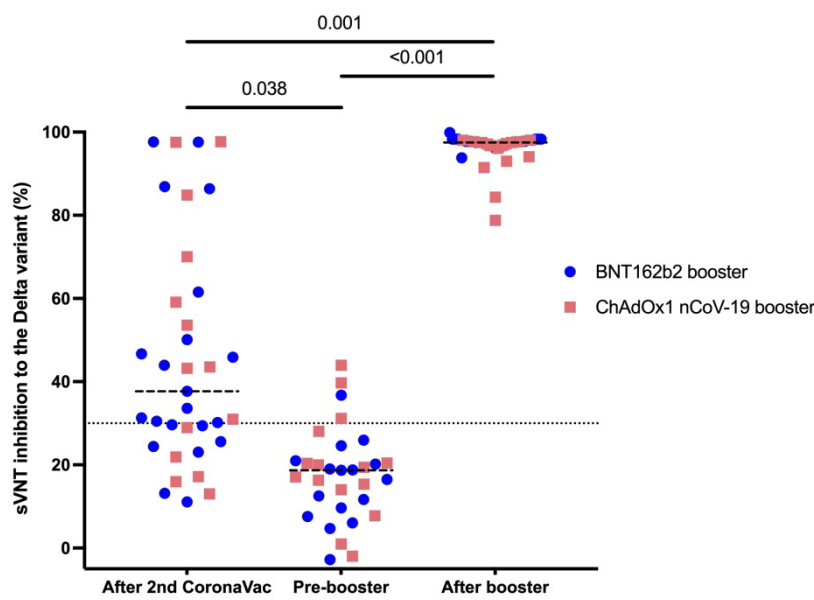

279 C

280

281

282

283

284

285

286

287

288

289

290

291

292

293

294

295

296

297

298

299

300

301

302

303

304

305

306

307

308

309

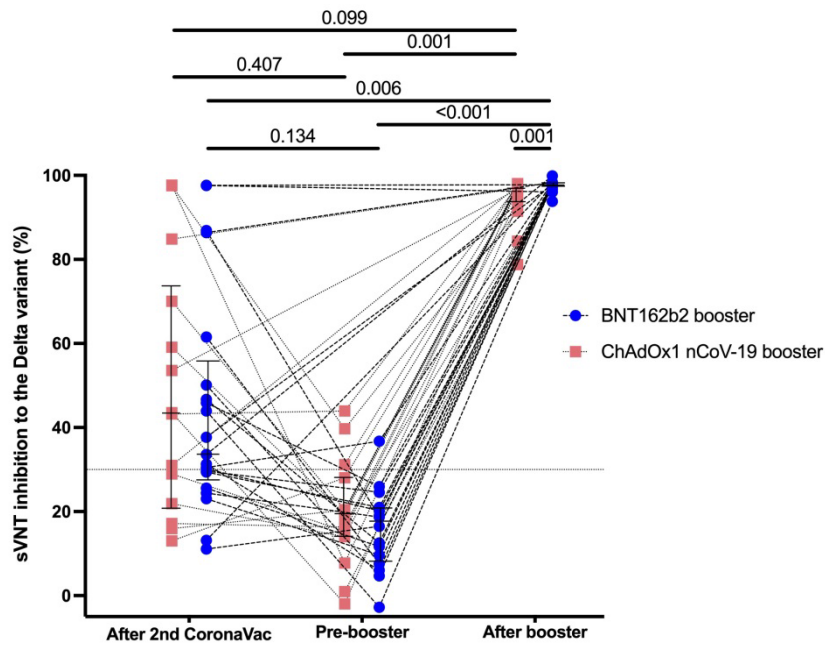

310 **Tables**

311 **Table 1** Proportions of reactogenicity in each group

|                                    | ChAdOx1 nCoV-19 | BNT162b2 | P-value |
|------------------------------------|-----------------|----------|---------|
| Pain at injection site (%)         | 77.8            | 91.3     | 0.377   |
| Fever (%)                          | 66.7            | 39.1     | 0.080   |
| Myalgia (%)                        | 66.7            | 65.2     | 0.923   |
| Headache (%)                       | 38.9            | 13.0     | 0.075   |
| Chills (%)                         | 50.0            | 21.7     | 0.058   |
| Nausea and/or vomit (%)            | 11.1            | 26.1     | 0.429   |
| Rash (%)                           | 5.6             | 0        | 0.439   |
| Weakness (%)                       | 5.6             | 4.3      | 1       |
| Symptoms requiring medications (%) | 94.4            | 91.3     | 1       |
| Others (%)                         | 0               | 8.7†     | 0.243   |
| Duration of symptoms (median, IQR) | 2 (1–3)         | 3 (2–3)  | 0.139   |

312

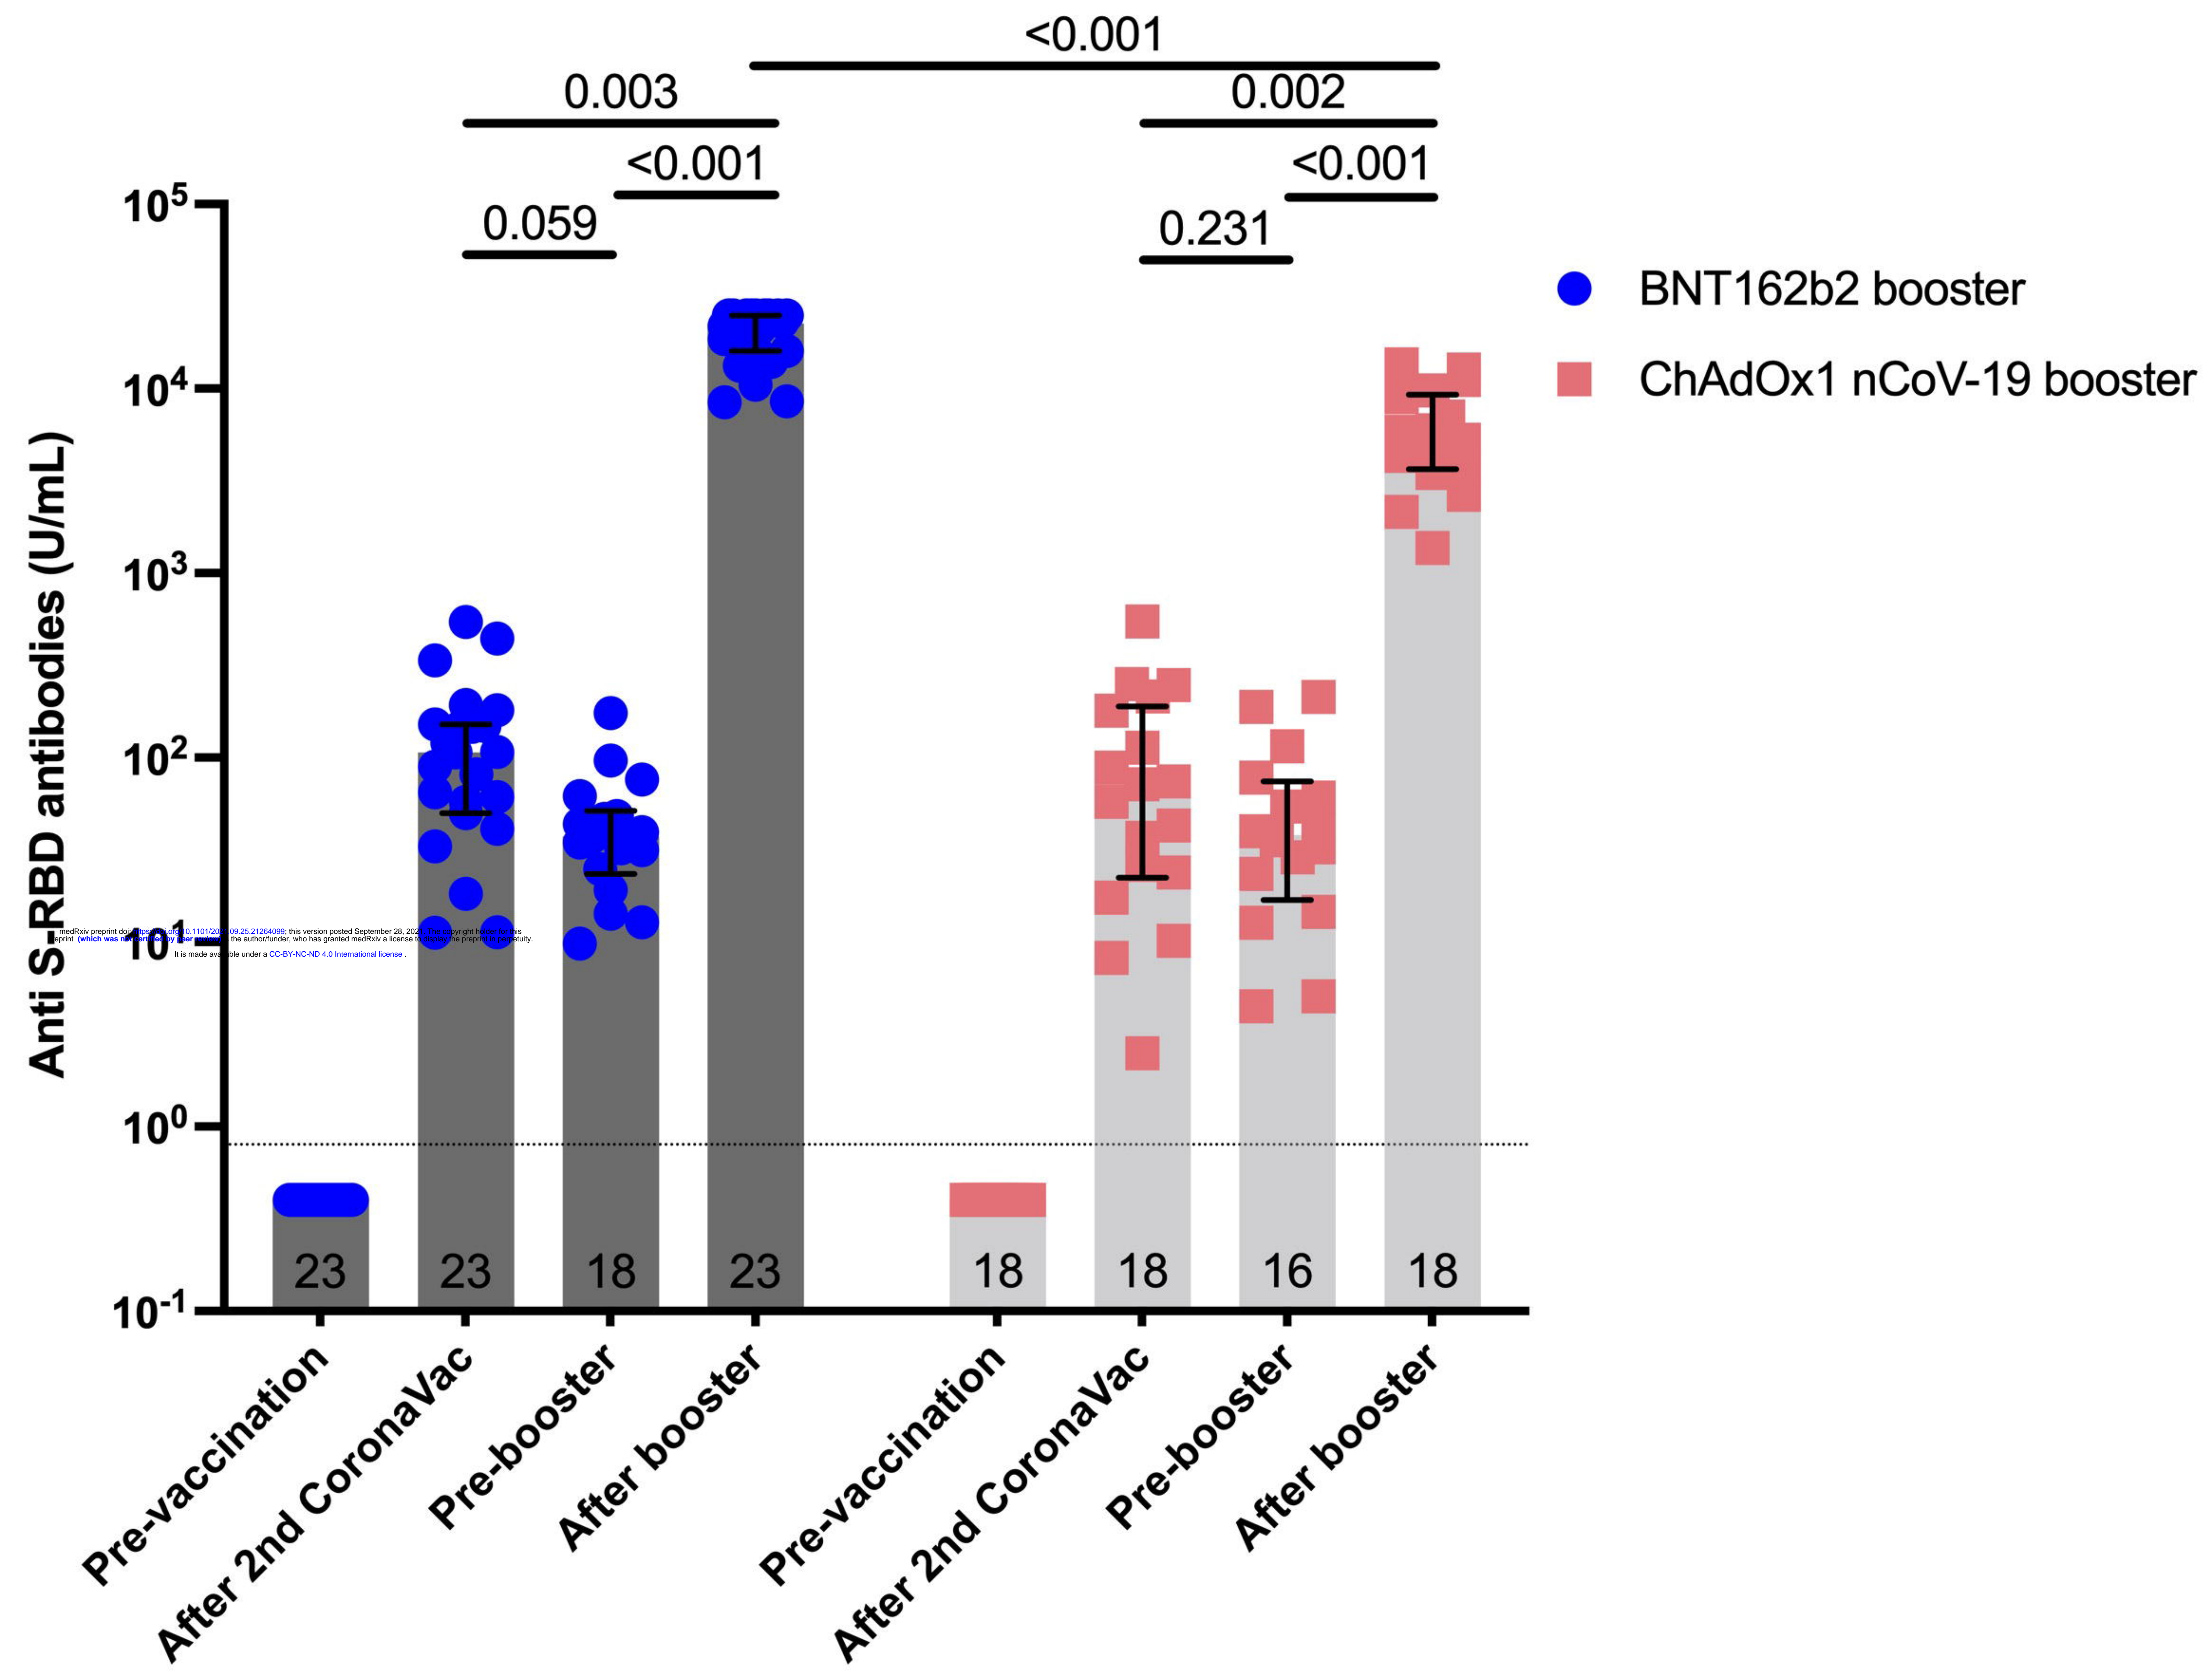

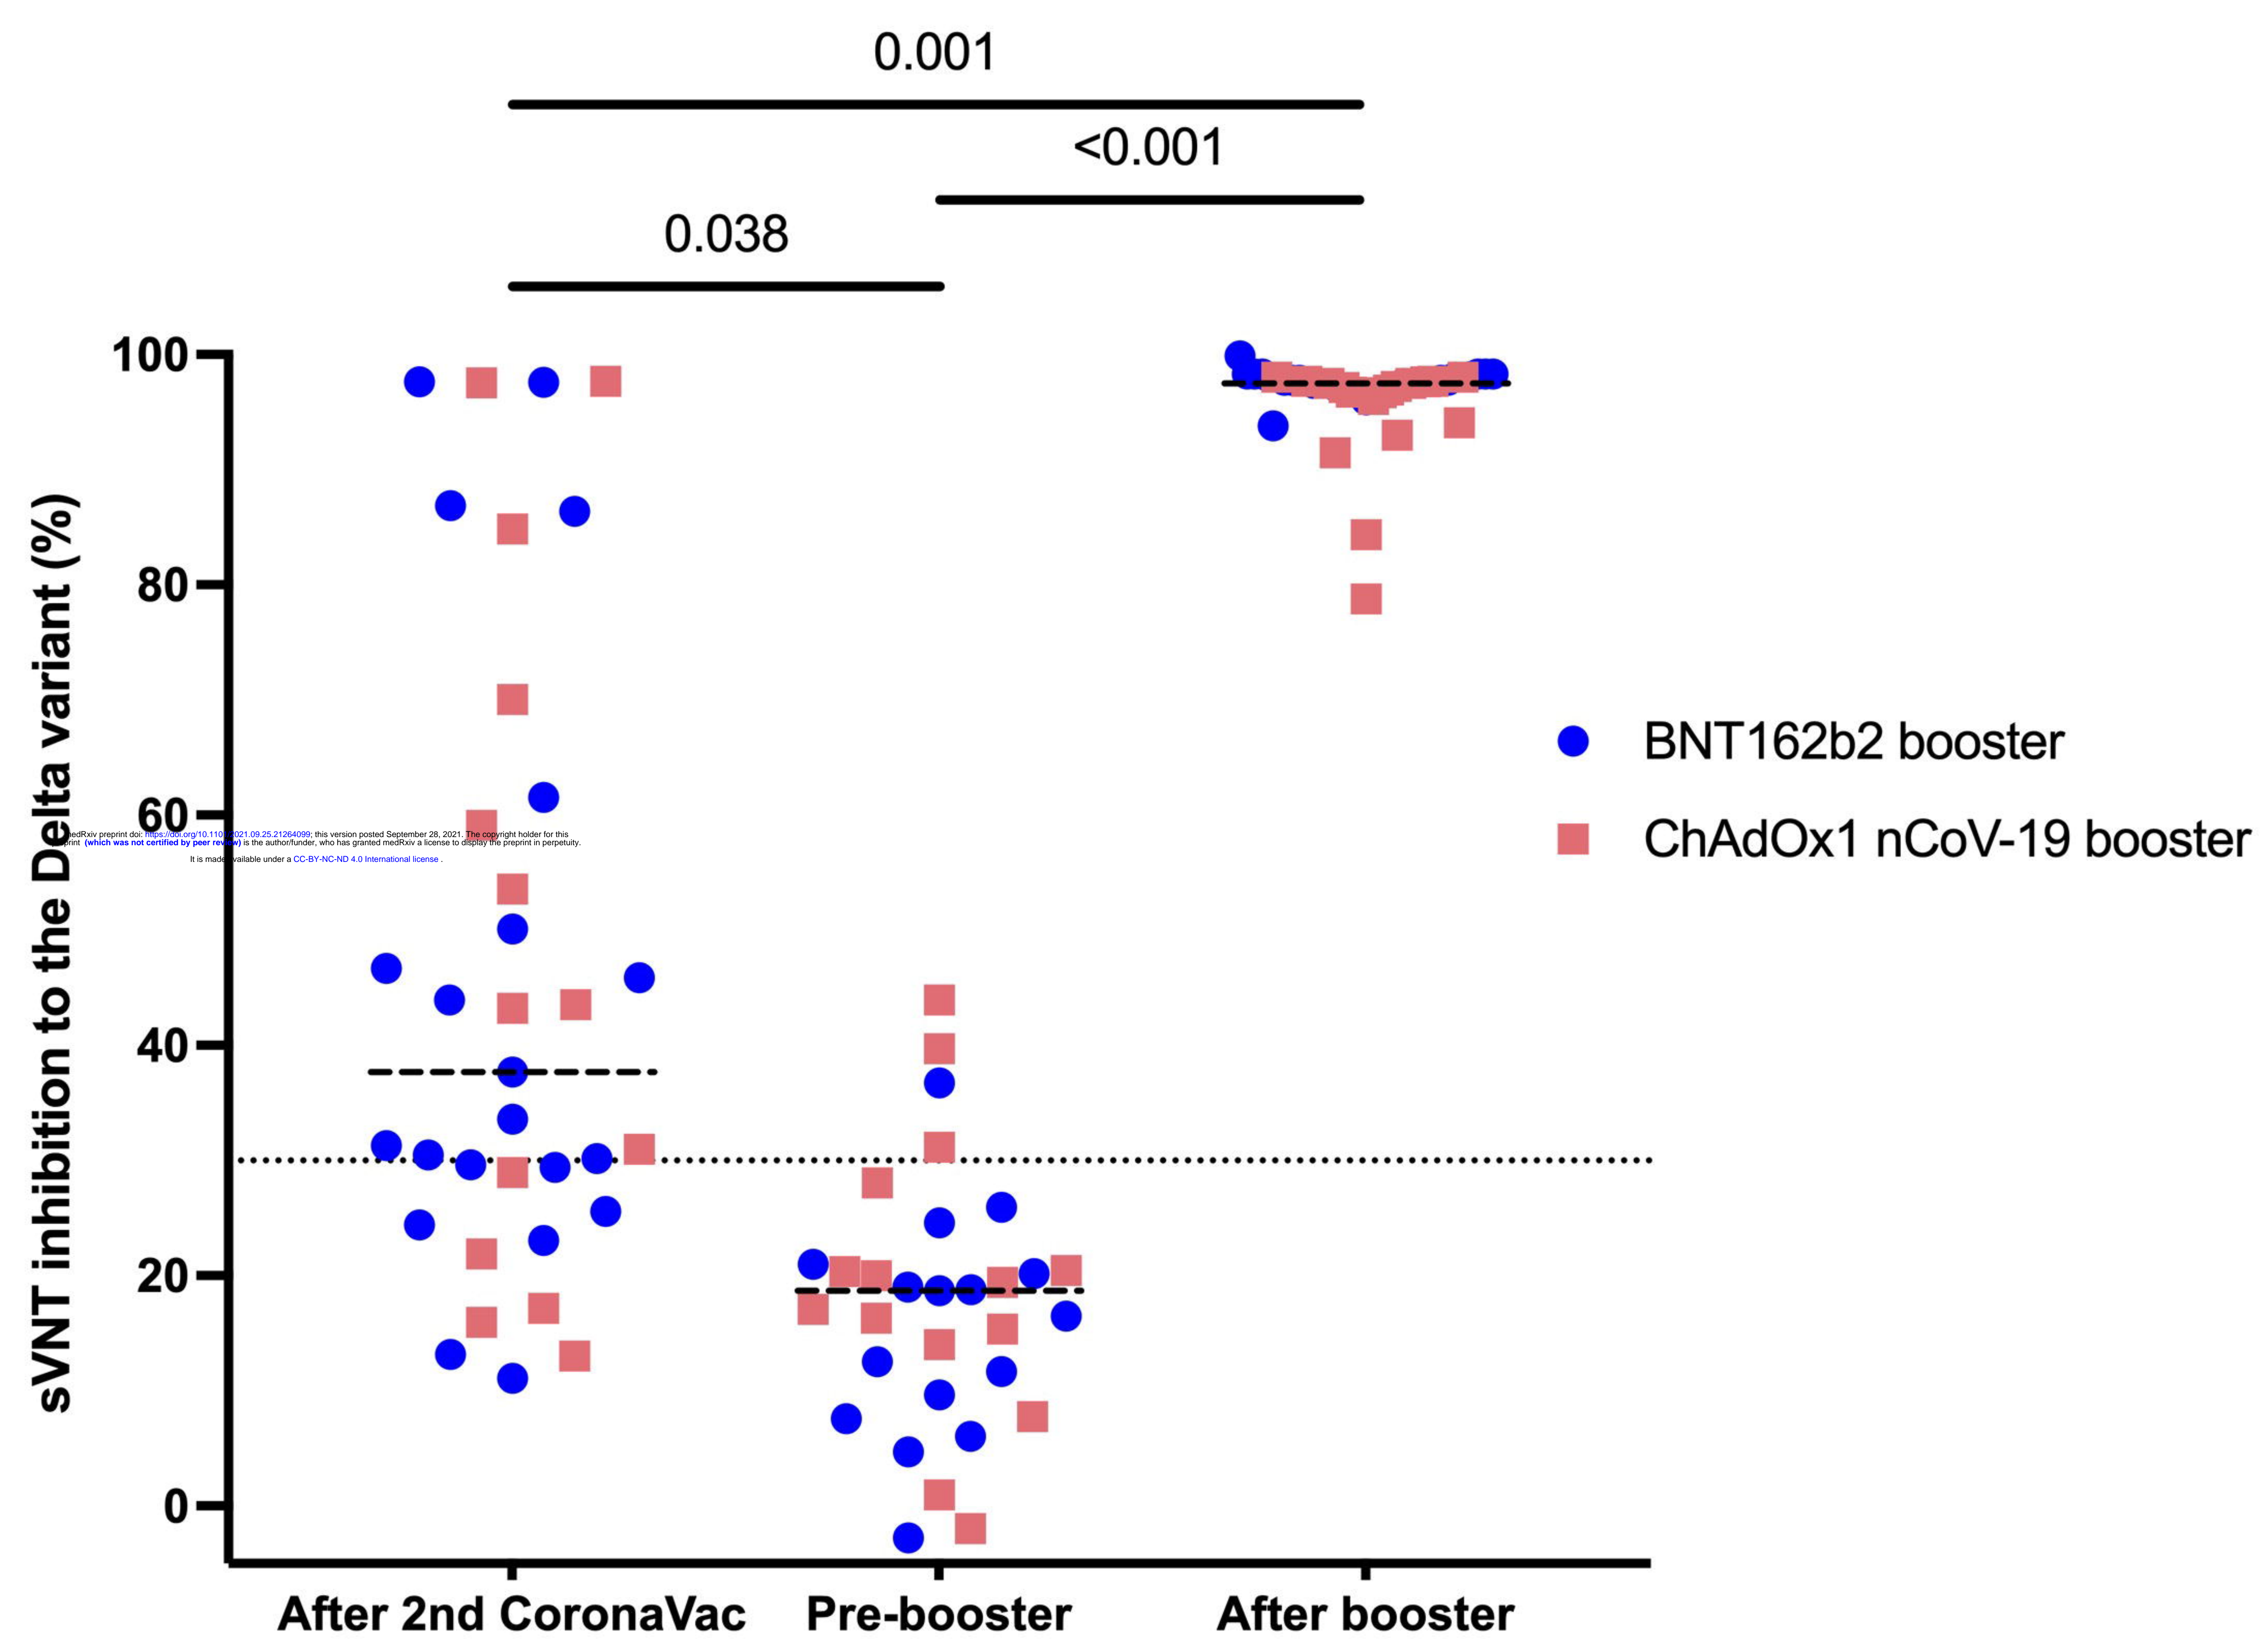

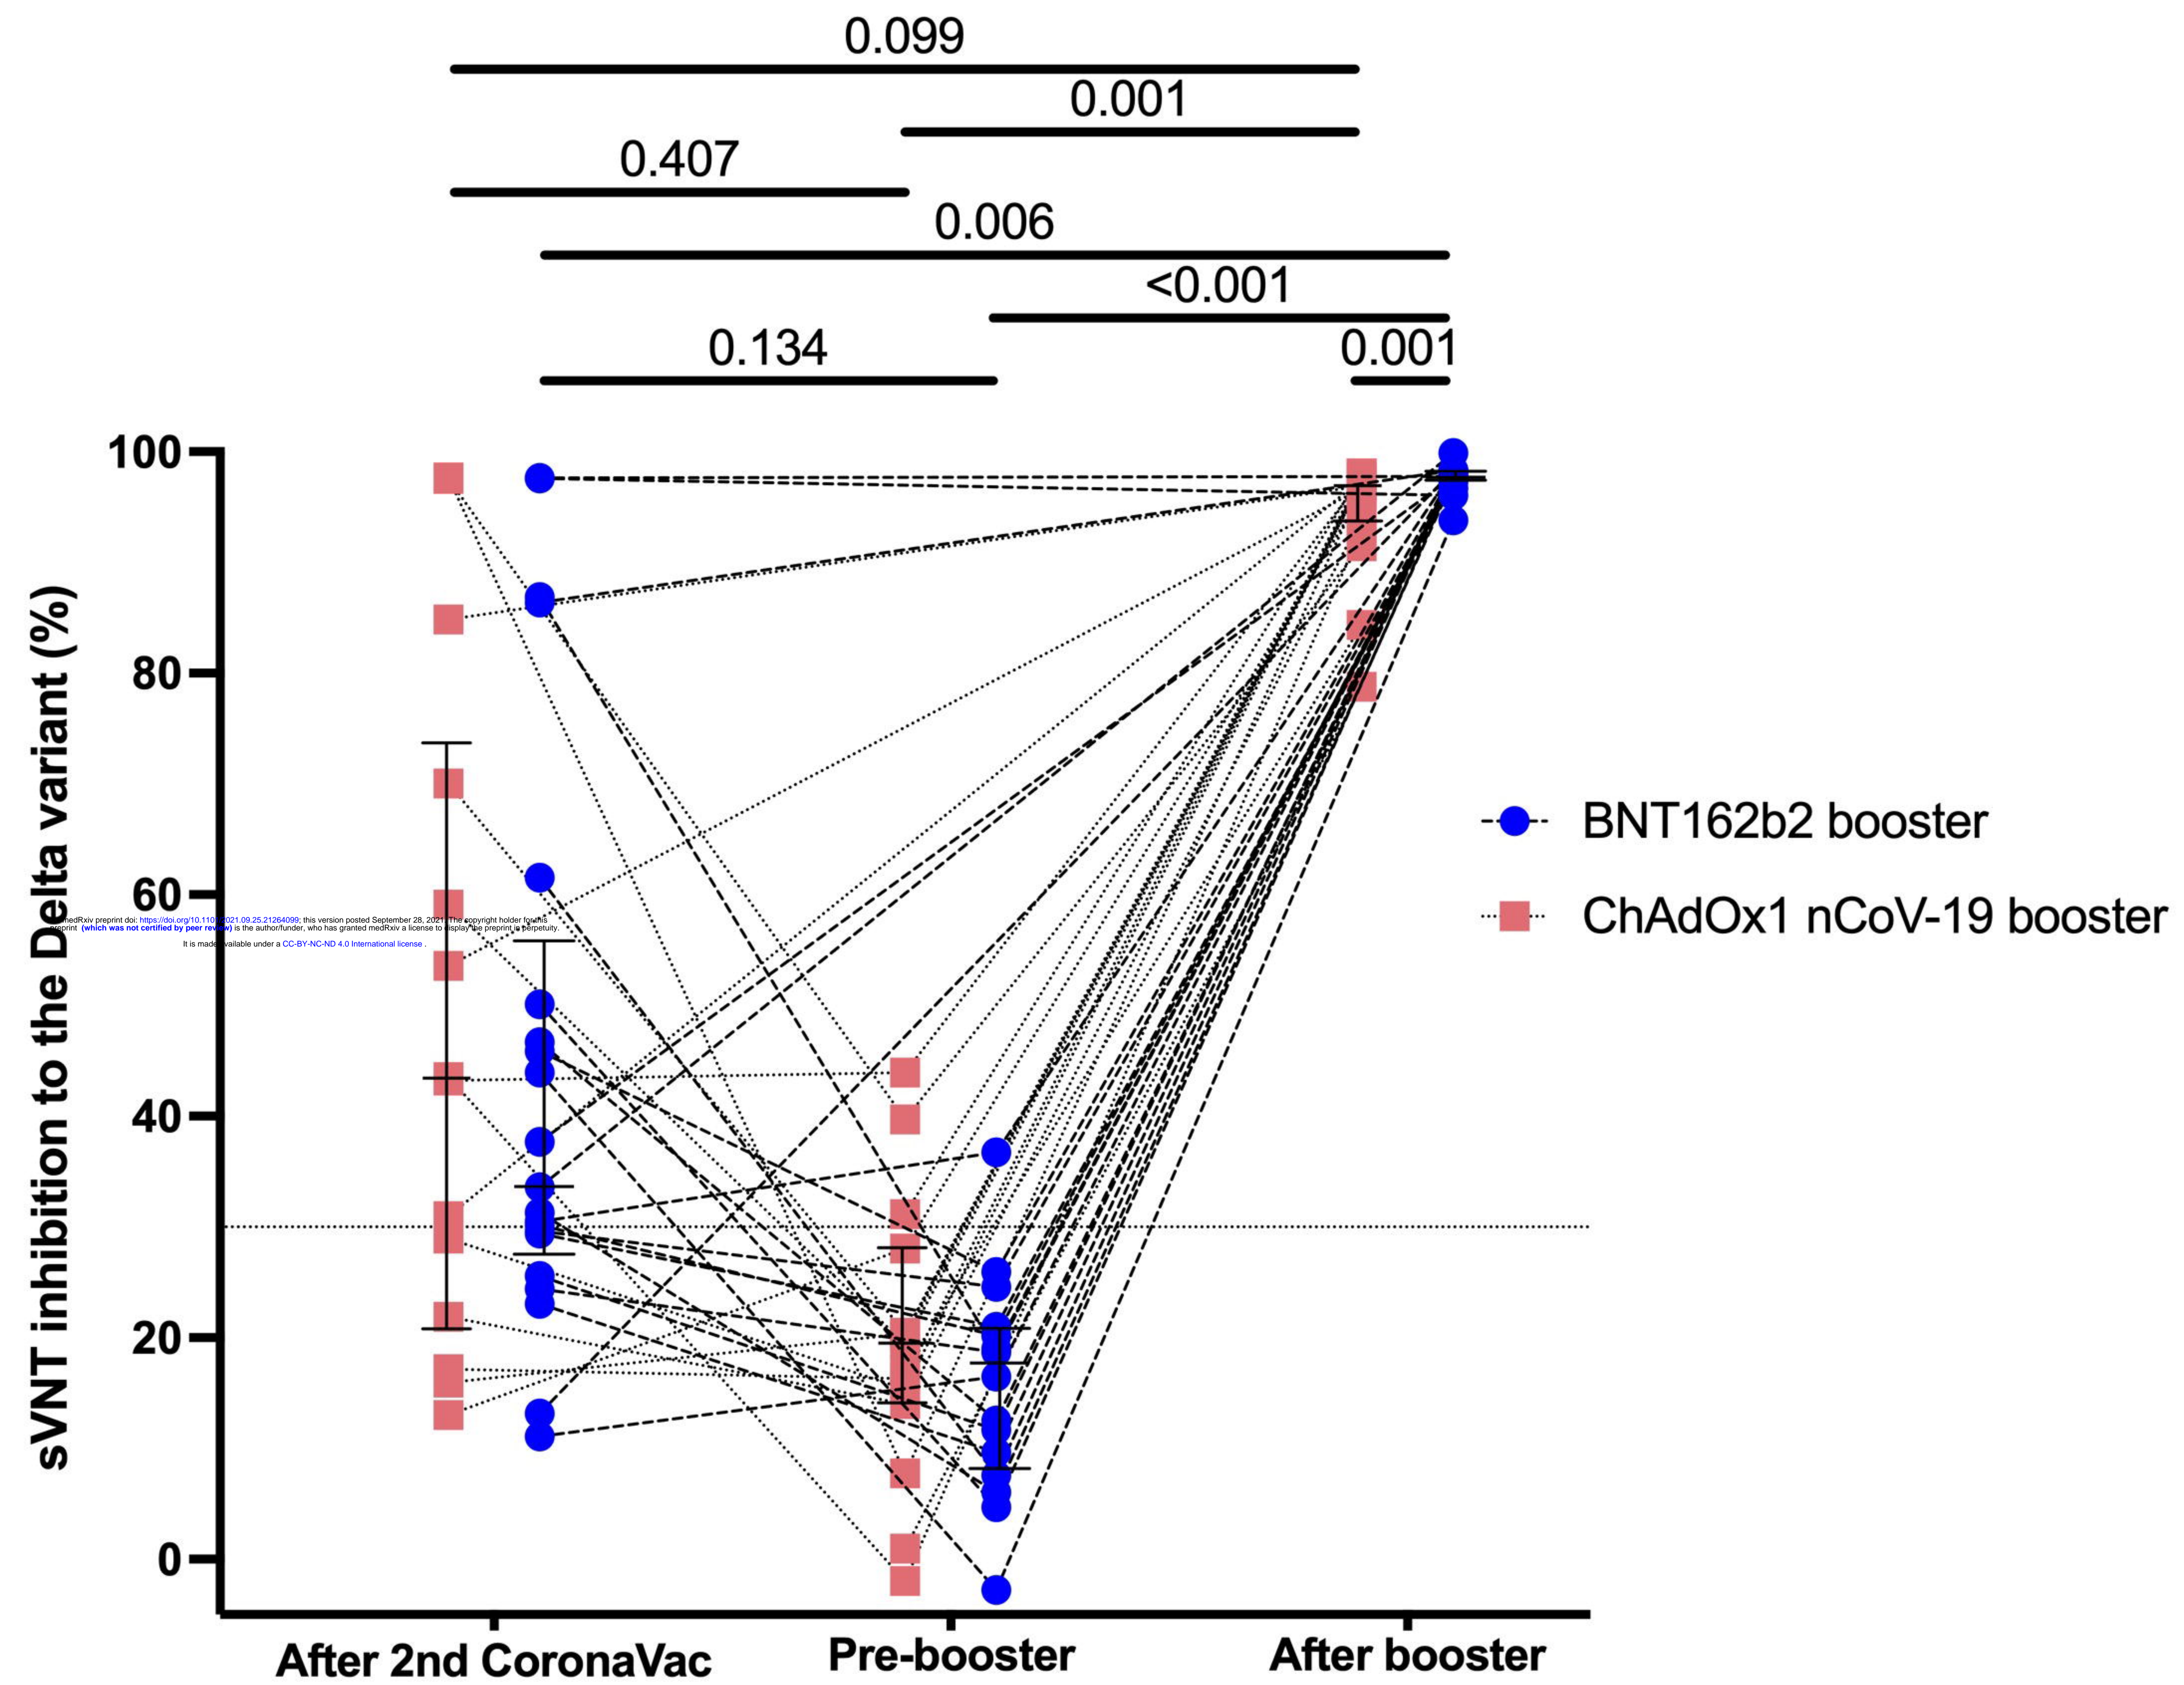

Source: https://medrxiv.org/content/10.1101/2021.09.25.21264099v1.full.pdf
